# Supplementary material for: A New Vanadium (III) Complex of 2,6-Bis(3,5-diphenylpyrazol-1-ylmethyl)pyridine as a Catalyst for Ethylene Polymerization
Source: MDPI journal article supplement (doi:10.3390/molecules18044728), 2013-04-22

# Supplementary Materials

Figure 1S.  $^{13}\text{C}$  NMR spectrum of polyethylene obtained by catalyst 2.

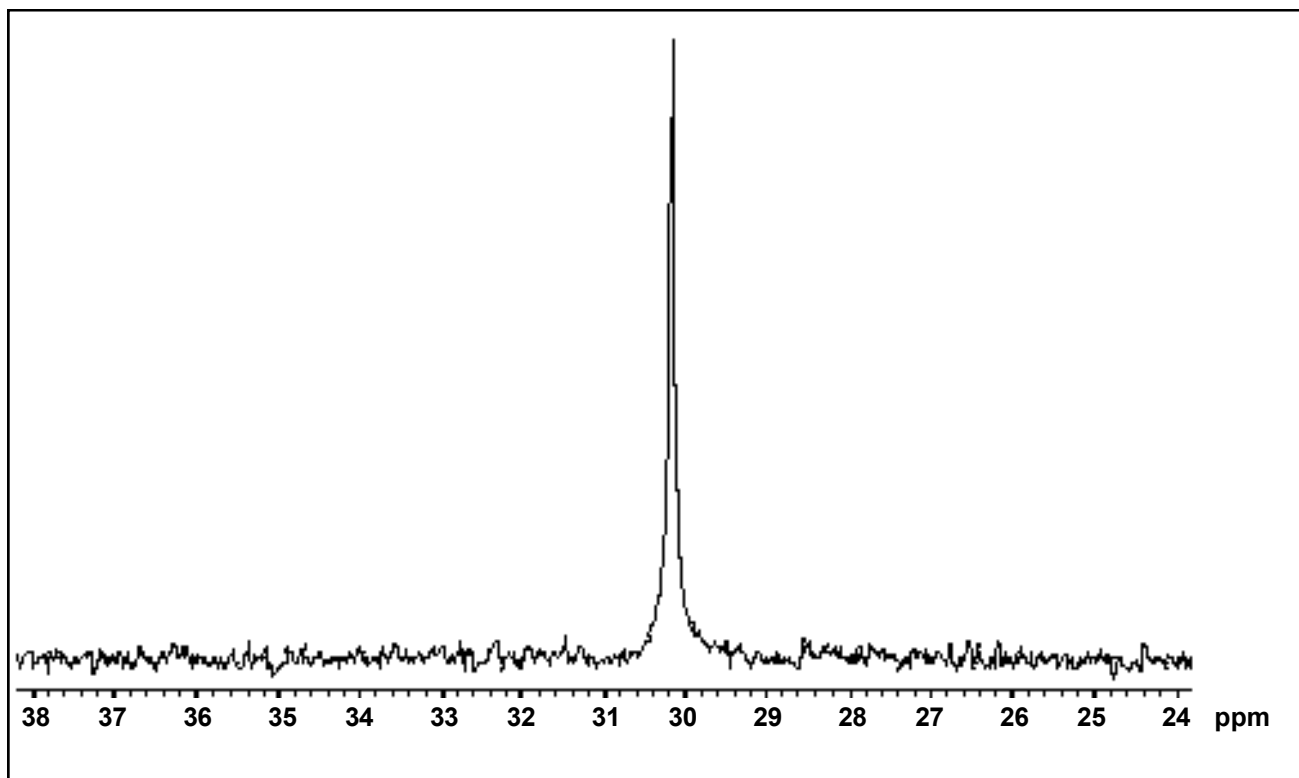

Figure 2S. (a–c). Mass spectra of  $\{2,6-[(3,5\text{-}ph_2pz)CH_2]_2py\}VCl_3$  (1).

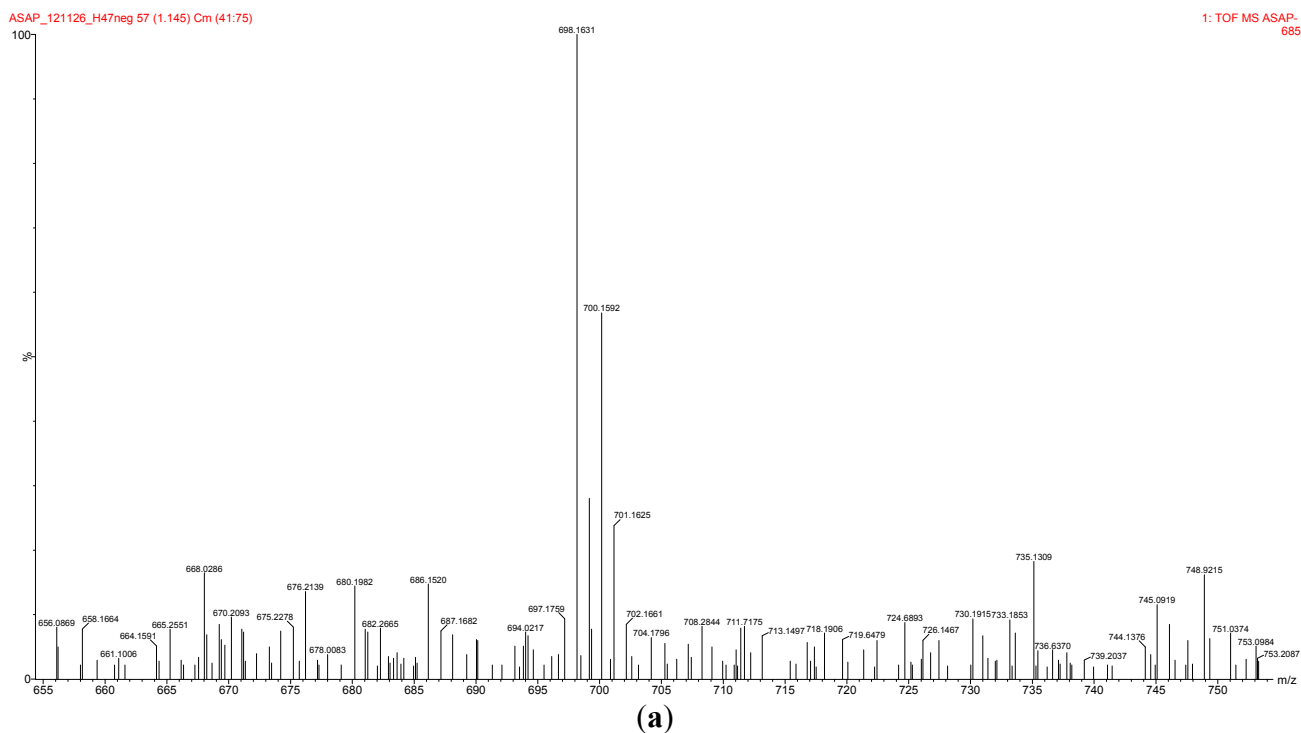

Figure 2S. Cont.

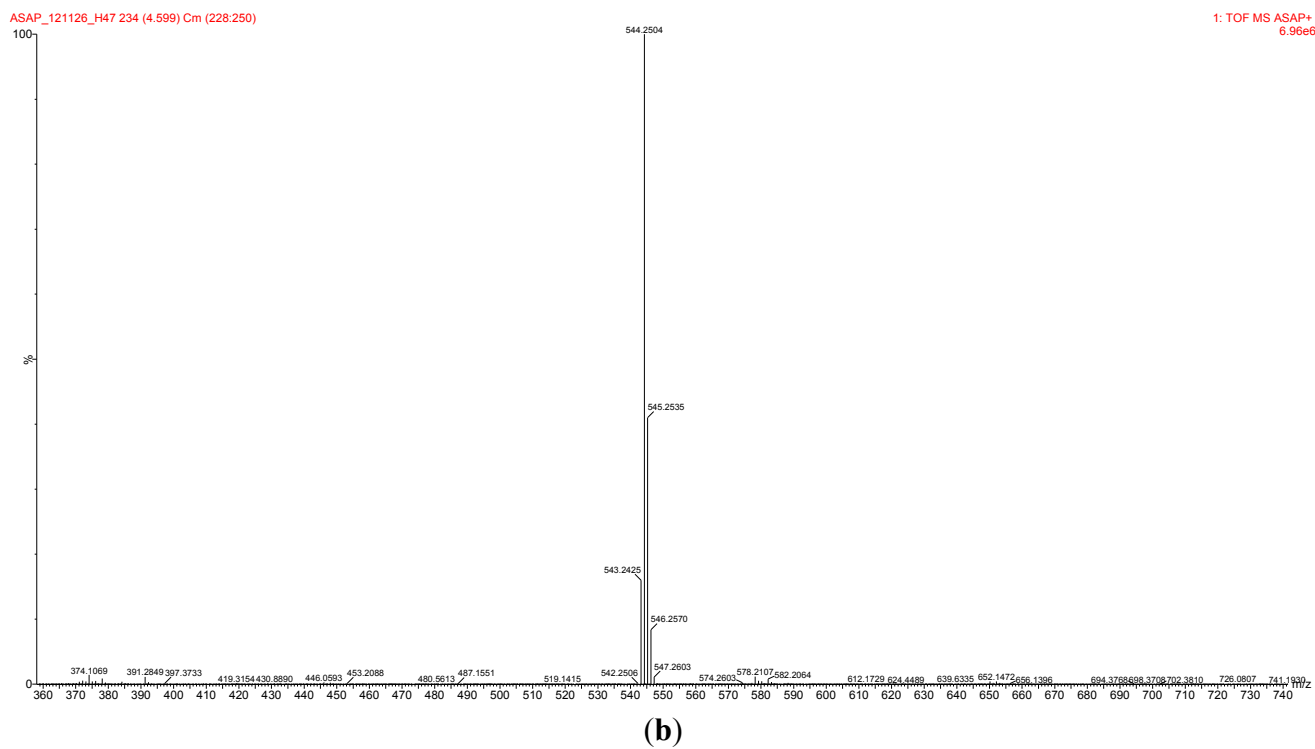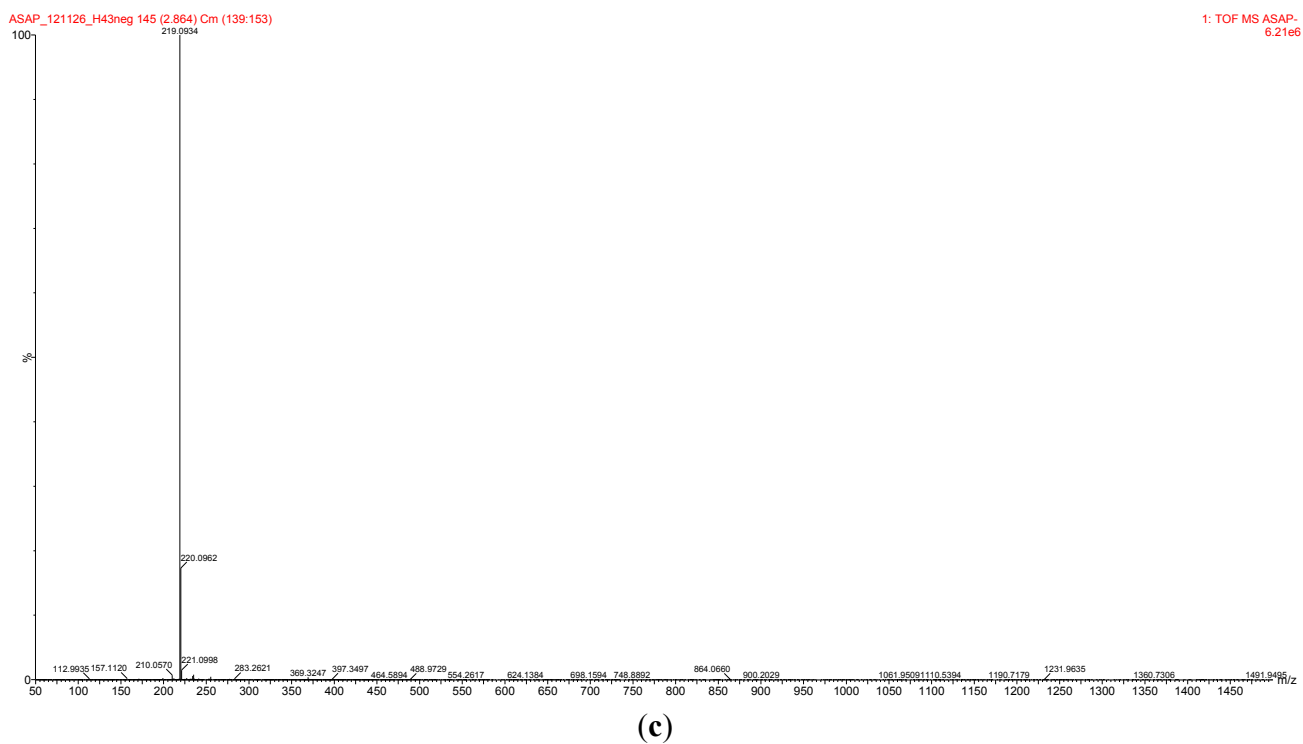

Supplement: s1 [file s1]
